# Supplementary material
Source: publisher figshare collection journal article supplement (https://acs.figshare.com/ndownloader/files/14379944)
Supplement: Supplementary file 1 [file 14379944]

# Mutual influences between organic matter and minerals during oil shale pyrolysis

Zhenghua Lu, Xiaosheng Zhao, Zhenyu Liu and Qingya Liu\*

State Key Laboratory of Chemical Resource Engineering, Beijing University of Chemical Technology, Beijing 100029

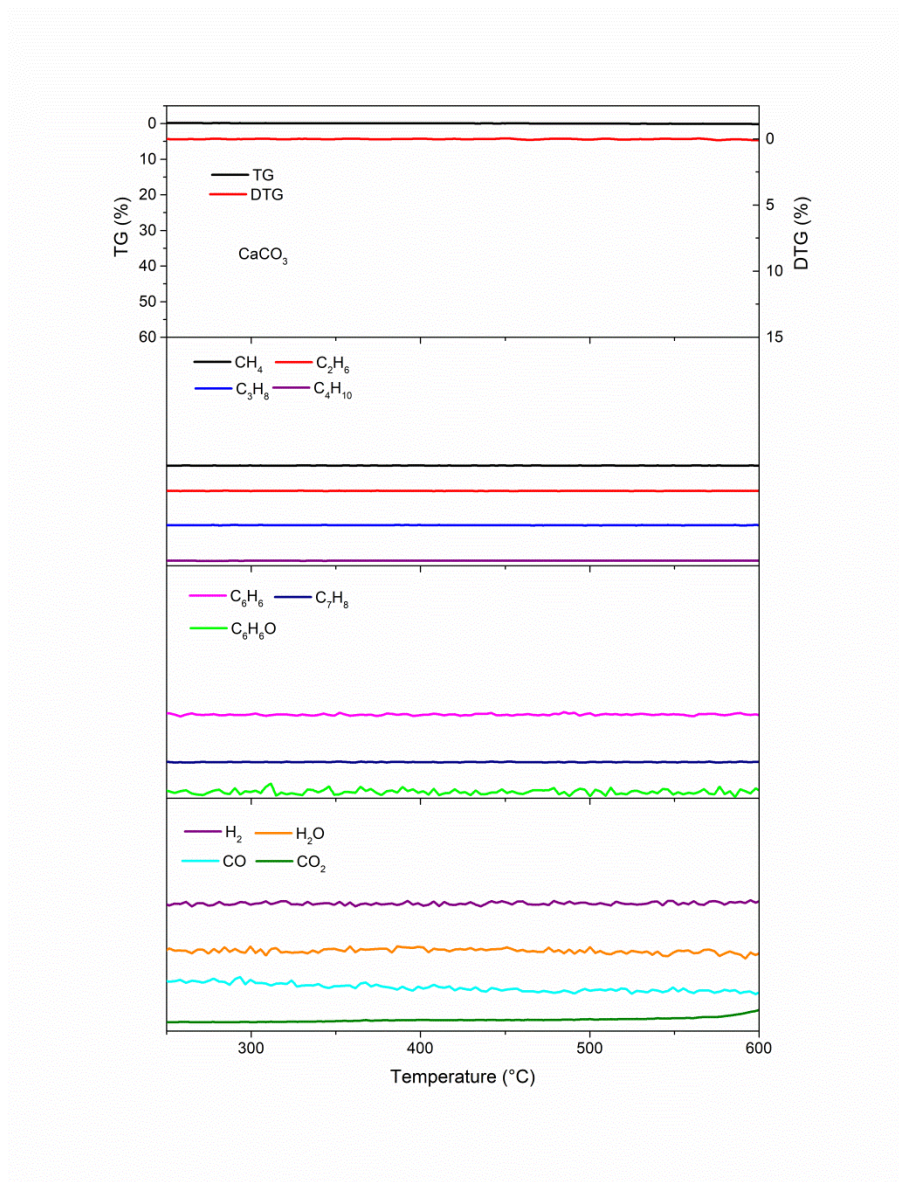

**Figure S1.** Results of TG/DTG and light volatile products detected by MS during pyrolysis of  $\text{CaCO}_3$ .

\* Corresponding author. E-mail: qyliu@mail.buct.edu.cn

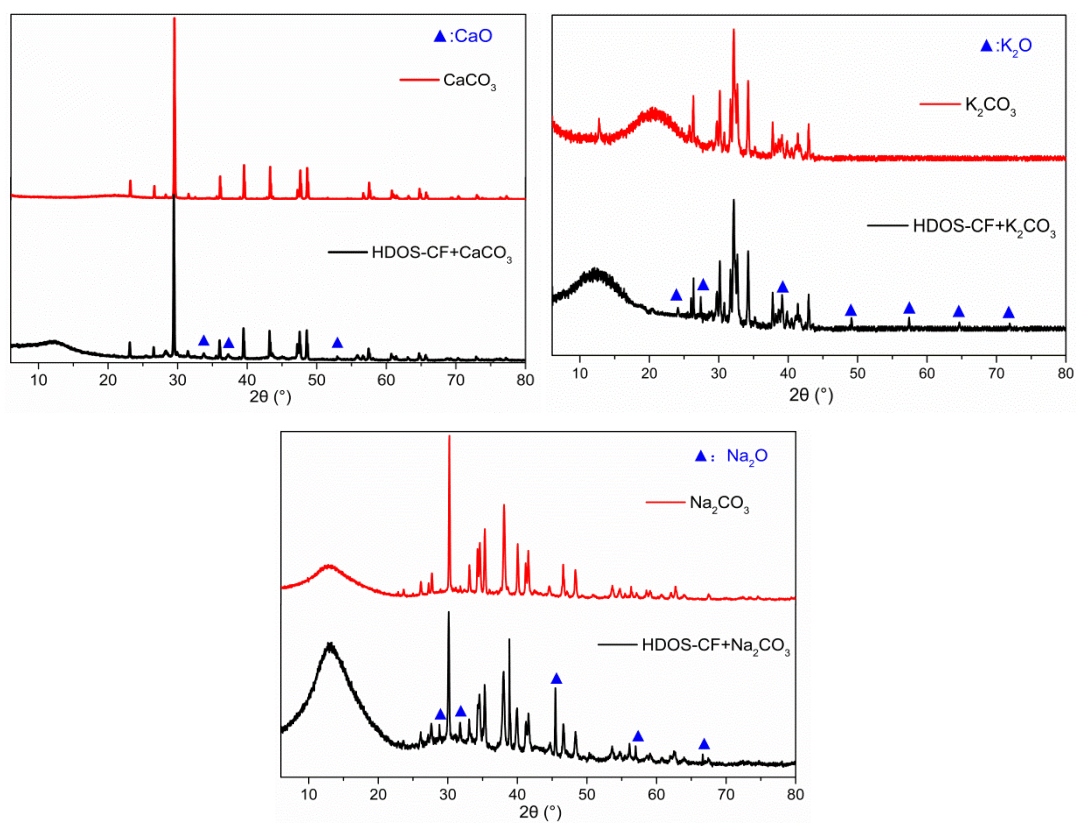

**Figure S2.** XRD patterns of the solid products of individual pyrolysis of  $\text{CaCO}_3$ ,  $\text{K}_2\text{CO}_3$  and  $\text{Na}_2\text{CO}_3$  and co-pyrolysis of HDOS-CF with these carbonates.

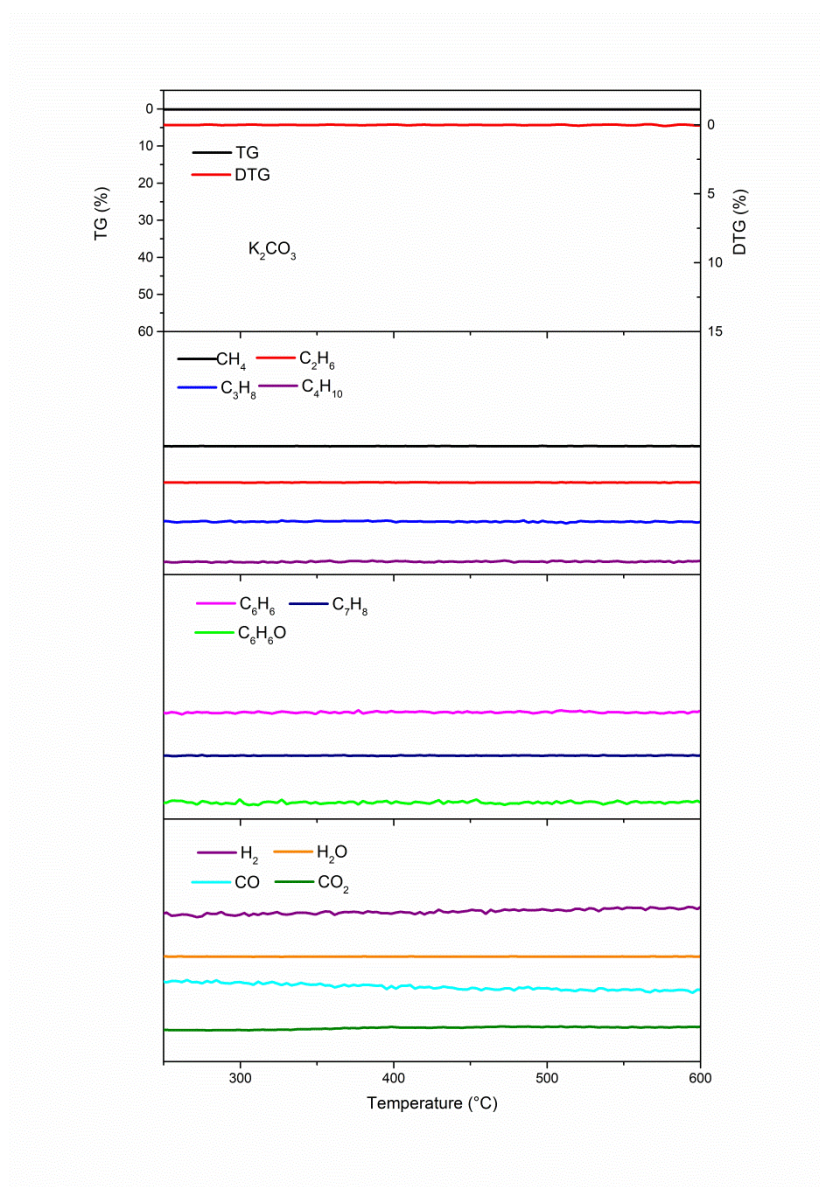

**Figure S3.** Results of TG/DTG and light volatile products detected by MS during pyrolysis of  $K_2CO_3$ .



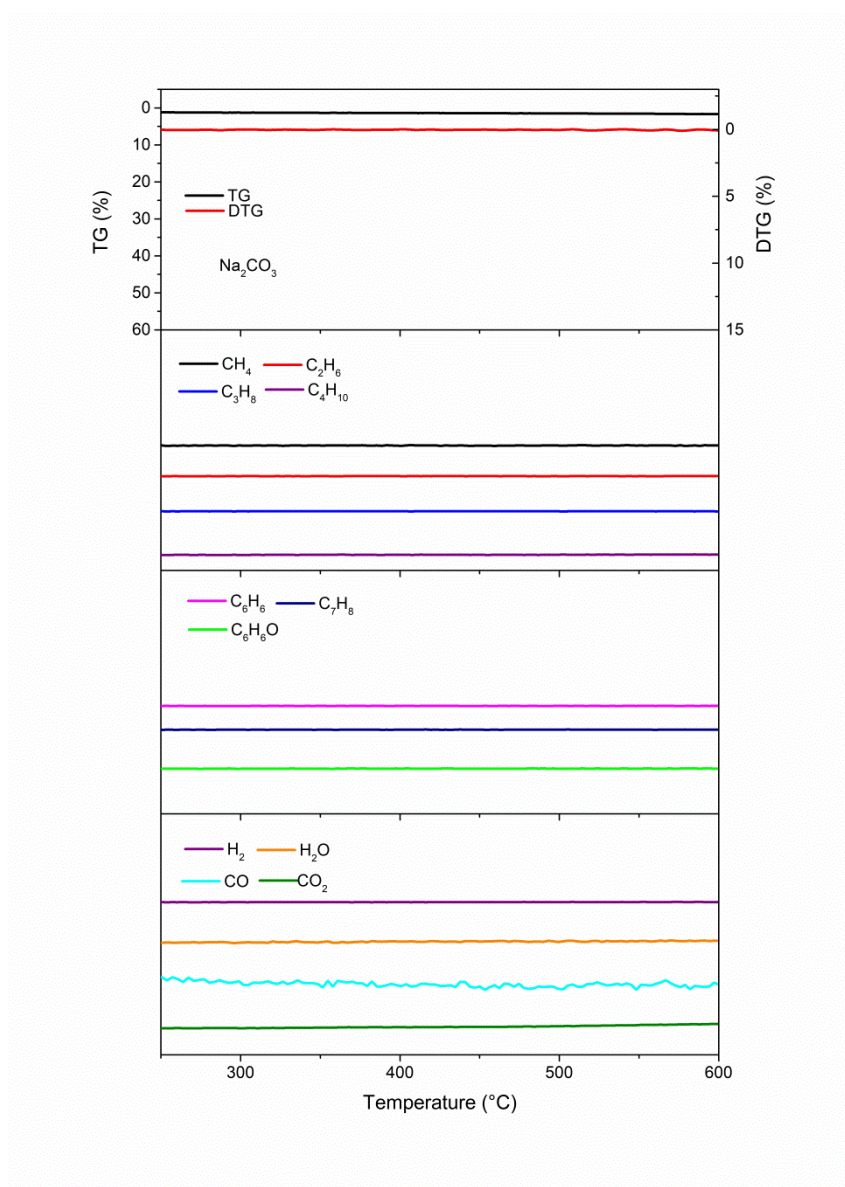

**Figure S4.** Results of TG/DTG and light volatile products detected by MS during pyrolysis of  $\text{Na}_2\text{CO}_3$ .

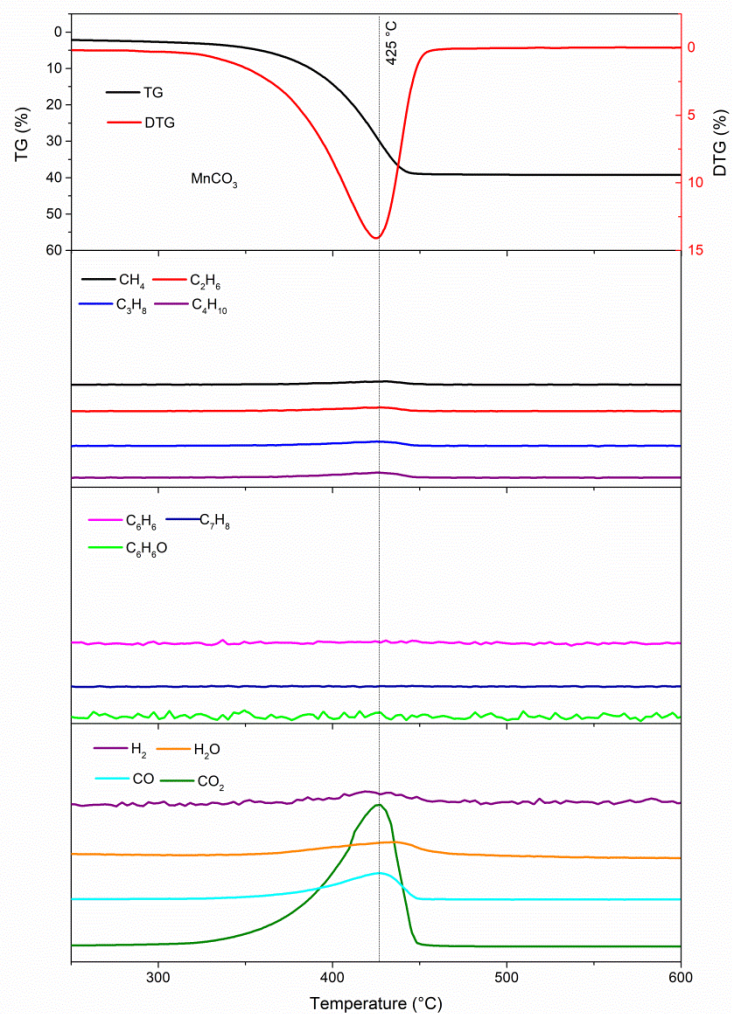

**Figure S5.** Results of TG/DTG and light volatile products detected by MS during pyrolysis of  $\text{MnCO}_3$ .

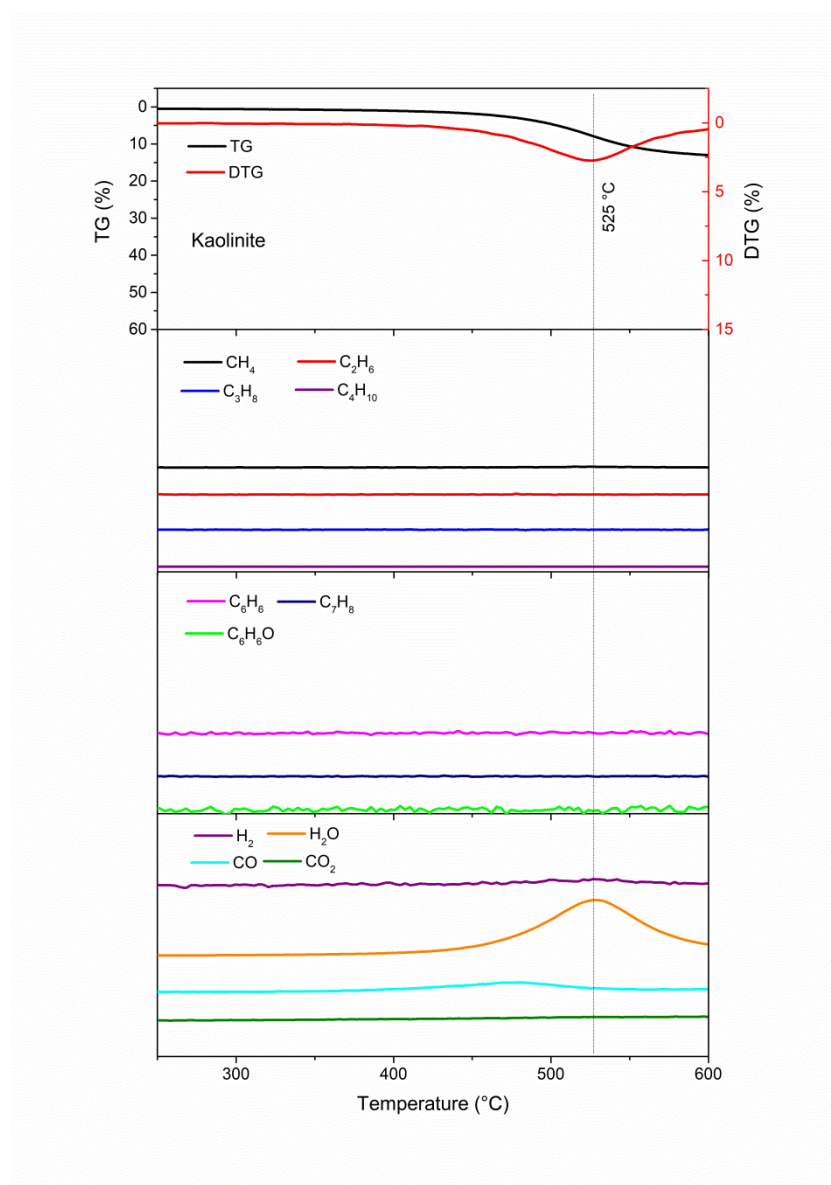

**Figure S6.** Results of TG/DTG and light volatile products detected by MS during pyrolysis of kaolinite.



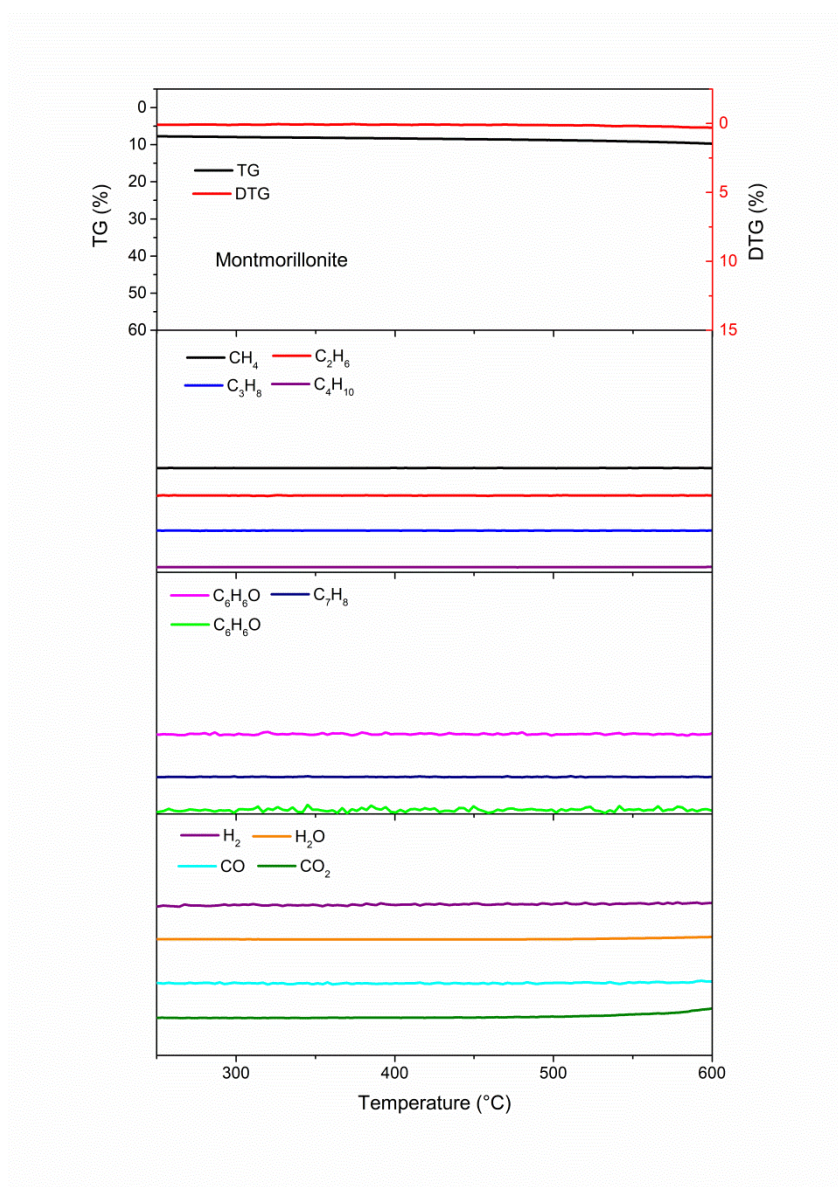

**Figure S7.** Results of TG/DTG and light volatile products detected by MS during pyrolysis of montmorillonite.

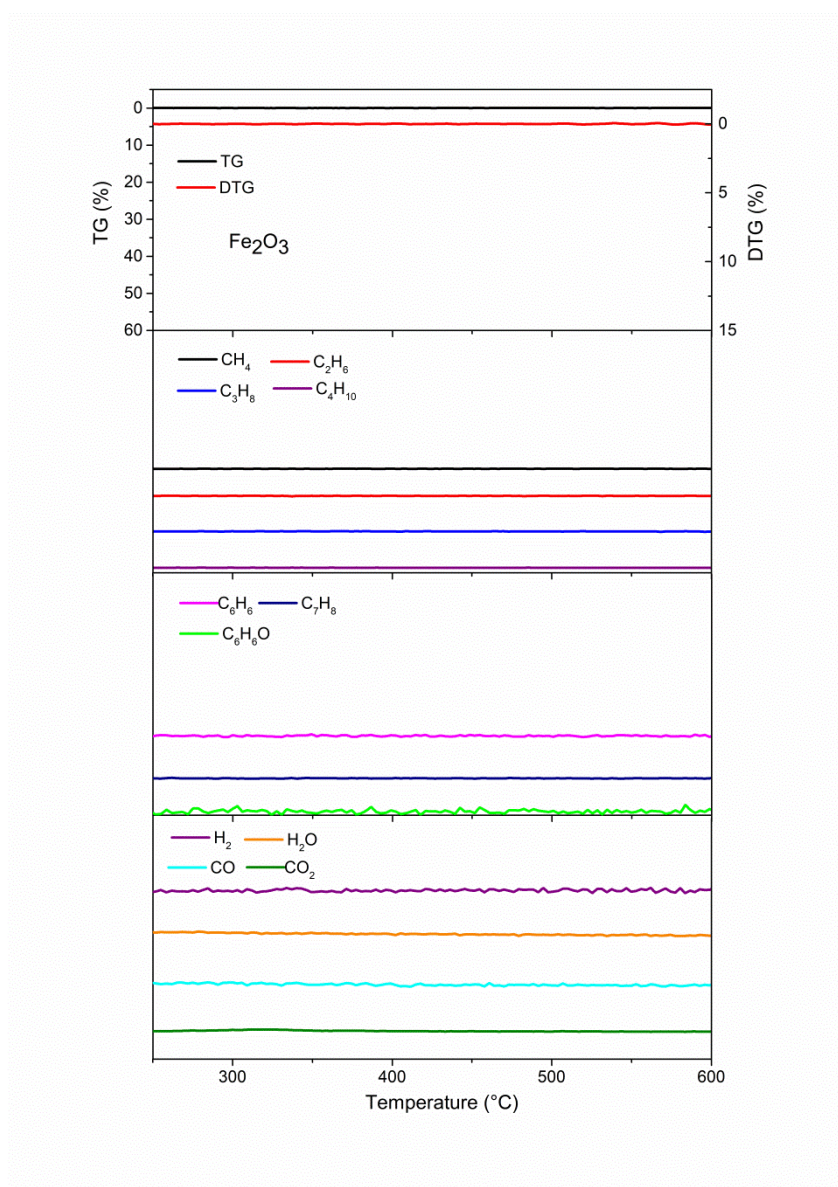

**Figure S8.** Results of TG/DTG and light volatile products detected by MS during pyrolysis of  $\text{Fe}_2\text{O}_3$ .



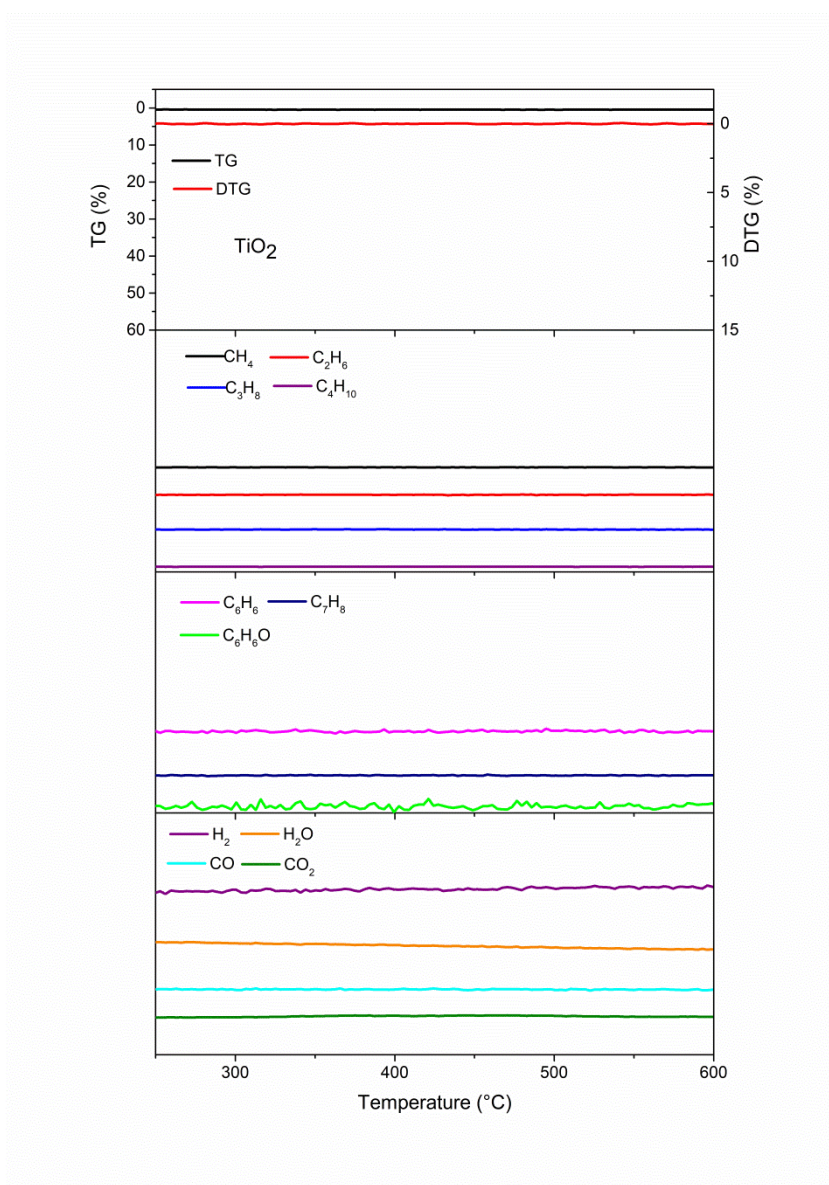

**Figure S9.** Results of TG/DTG and light volatile products detected by MS during pyrolysis of  $\text{TiO}_2$ .
